# Supplementary material
Source: Springer Nature journal article supplement (https://www.springermedizin.de/resource/supplementary/12950_2010_186_MOESM4_ESM.pdf/9558252)

**(A)**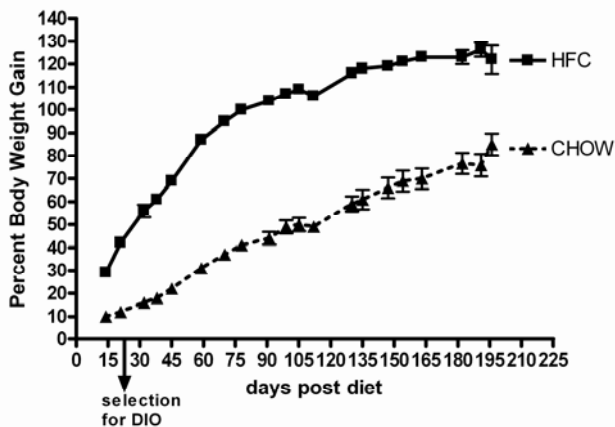**(B)**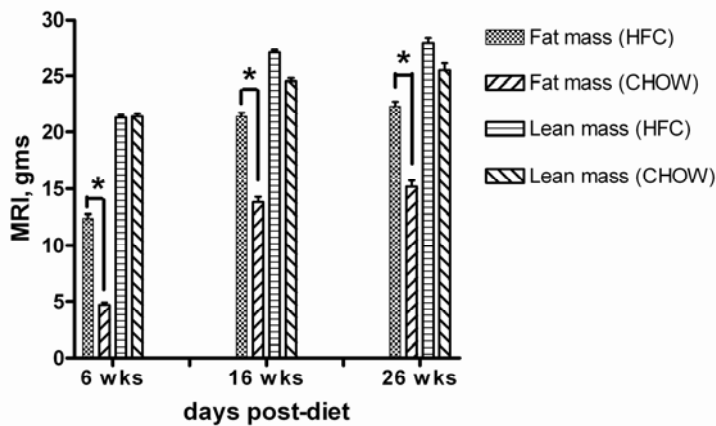

Supplement: MOESM4 [file 9558252]
